# Supplementary material
Source: PubMed Central journal article supplement (PMC6610884)
Supplement: NIHMS1033695-supplement-Supplemental_Information.pdf [file NIHMS1033695-supplement-Supplemental_Information.pdf]

# Supporting Information

## Design and Synthesis of Orally Bioavailable Piperazine Substituted 4(1*H*)-Quinolones with Potent Antimalarial Activity: Structure-Activity and Structure-Property Relationship Studies

Raghupathi Neelarapu,<sup>#,§</sup> Jordany R. Maignan,<sup>#,§</sup> Cynthia L. Lichorowic,<sup>†</sup> Andrii Monastyrskyi,<sup>§</sup> Alexis N. LaCruce,<sup>¥</sup> Tina S. Mutka,<sup>¥</sup> Lynn D. Blake,<sup>¥</sup> Debora Casandra,<sup>¥</sup> Sherman Mashkouri,<sup>¥</sup> Jeremy N. Burrows,<sup>€</sup> Paul A. Willis,<sup>€</sup> Dennis E. Kyle,<sup>¥</sup> and Roman Manetsch.<sup>\*,†,⊥</sup>

<sup>§</sup>Department of Chemistry, University of South Florida, CHE 205, 4202 E. Fowler Ave, Tampa, Florida 33620, United States

<sup>†</sup>Department of Chemistry and Chemical Biology, Northeastern University, 102 Hurtig Hall, 360 Huntington Avenue, Boston, MA 02115, United States

<sup>¥</sup>Department of Global Health, College of Public Health, University of South Florida, 3720 Spectrum Blvd, Suite 304, Tampa, Florida 33612, United States

<sup>€</sup>Medicines for Malaria Venture, 20, Route de Pré-Bois, P.O. Box 1826, 1215 Geneva 15, Switzerland

<sup>⊥</sup>Department of Pharmaceutical Sciences, Northeastern University, 102 Hurtig Hall, 360 Huntington Avenue, Boston, MA 02115, United States

## Table of contents

|                                                                                                 |   |
|-------------------------------------------------------------------------------------------------|---|
| <b>Table S1:</b> Solubility and LogD of Piperazinyl-Substituted 4(1 <i>H</i> )-Quinolones ..... | 3 |
| <b>Table S2:</b> Solubility and LogD of Piperazinyl-Substituted 4(1 <i>H</i> )-Quinolones ..... | 4 |
| <b>Table S3:</b> Solubility and LogD of Piperazinyl-Substituted 4(1 <i>H</i> )-Quinolones ..... | 5 |
| <b>Table S4:</b> Solubility and LogD of Piperazinyl-Substituted 4(1 <i>H</i> )-Quinolones ..... | 6 |

**Table S1:** Solubility and LogD of Piperazinyl-Substituted 4(1*H*)-Quinolones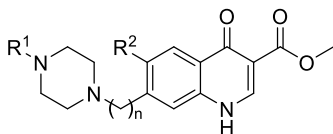

| Compound | R <sup>1</sup> | R <sup>2</sup>    | n | Solubility<br>pH 2.0 (μM) | Solubility<br>pH 6.5 (μM) | LogD<br>pH 7.4 |
|----------|----------------|-------------------|---|---------------------------|---------------------------|----------------|
| 8ac      |                | -H                | 2 | ≥ 80                      | ≥ 80                      | 5.11           |
| 8ad      |                | -H                | 2 | ≥ 80                      | ≥ 80                      | 1.72           |
| 8ae      |                | -H                | 2 | ≥ 80                      | ≥ 80                      | 1.68           |
| 8a       |                | -H                | 0 | 1-19.9                    | 1-19.9                    | 2.58           |
| 8b       |                | -H                | 0 | 60-79.9                   | 60-79.9                   | 2.21           |
| 8i       |                | -H                | 0 | ≥ 80                      | 40-59.9                   | 2.08           |
| 8j       |                | -H                | 1 | ≥ 80                      | ≥ 80                      | 0.86           |
| 8k       |                | -H                | 1 | ≥ 80                      | ≥ 80                      | 2.06           |
| 8l       |                | -H                | 1 | ≥ 80                      | ≥ 80                      | 1.66           |
| 8m       |                | -H                | 1 | ≥ 80                      | ≥ 80                      | 0.87           |
| 8q       |                | -CH <sub>3</sub>  | 1 | ≥ 80                      | 60-79.9                   | 2.81           |
| 8r       |                | -CH <sub>3</sub>  | 1 | ≥ 80                      | ≥ 80                      | 1.94           |
| 8s       |                | -CH <sub>3</sub>  | 1 | ≥ 80                      | ≥ 80                      | 2.03           |
| 8w       |                | -OCH <sub>3</sub> | 1 | ≥ 80                      | ≥ 80                      | 1.32           |
| 8x       |                | -OCH <sub>3</sub> | 1 | ≥ 80                      | 60-79.9                   | 1.28           |
| 8c       |                | -CH <sub>3</sub>  | 0 | ≥ 80                      | 40-59.9                   | 2.31           |
| 8g       |                | -CH <sub>3</sub>  | 0 | ≥ 80                      | ≥ 80                      | 2.37           |
| 8d       |                | -OCH <sub>3</sub> | 0 | ≥ 80                      | 1-19.9                    | 2.64           |
| 8h       |                | -OCH <sub>3</sub> | 0 | 60-79.9                   | 40-59.9                   | 2.03           |

**Table S2:** Solubility and LogD of Piperazinyl-Substituted 4(1*H*)-Quinolones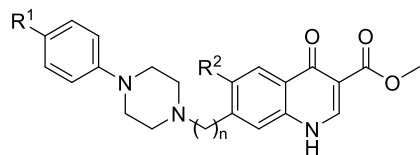

| Compound   | R <sup>1</sup>    | R <sup>2</sup>    | n | Solubility<br>pH 2.0 (μM) | Solubility<br>pH 6.5 (μM) | LogD<br>pH 7.4 |
|------------|-------------------|-------------------|---|---------------------------|---------------------------|----------------|
| <b>8o</b>  | -F                | -H                | 1 | ≥ 80                      | ≥ 80                      | 2.38           |
| <b>8u</b>  | -F                | -CH <sub>3</sub>  | 1 | ≥ 80                      | 40-59.9                   | 2.90           |
| <b>8aa</b> | -F                | -OCH <sub>3</sub> | 1 | 60-79.9                   | ≥ 80                      | 1.31           |
| <b>8e</b>  | -OCH <sub>3</sub> | -H                | 0 | 40-59.9                   | 20-39.9                   | 2.44           |
| <b>8f</b>  | -OCH <sub>3</sub> | -OCH <sub>3</sub> | 0 | 60-79.9                   | 20-39.9                   | 2.48           |
| <b>8n</b>  | -OCH <sub>3</sub> | -H                | 1 | ≥ 80                      | 40-59.9                   | 2.11           |
| <b>8t</b>  | -OCH <sub>3</sub> | -CH <sub>3</sub>  | 1 | ≥ 80                      | 20-39.9                   | 2.61           |
| <b>8z</b>  | -OCH <sub>3</sub> | -OCH <sub>3</sub> | 1 | ≥ 80                      | ≥ 80                      | 2.19           |
| <b>8p</b>  | -CF <sub>3</sub>  | -H                | 1 | ≥ 80                      | 1-19.9                    | 3.23           |
| <b>8v</b>  | -CF <sub>3</sub>  | -CH <sub>3</sub>  | 1 | ≥ 80                      | 1-19.9                    | 3.73           |
| <b>8ab</b> | -CF <sub>3</sub>  | -OCH <sub>3</sub> | 1 | 1-19.9                    | 1-19.9                    | 1.29           |

**Table S3:** Solubility and LogD of Piperazinyl-Substituted 4(1*H*)-Quinolones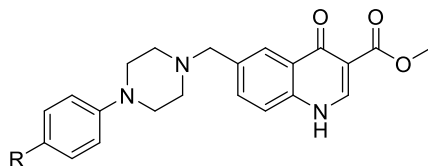

| Compound   | R                 | Solubility<br>pH 2.0 ( $\mu\text{M}$ ) | Solubility<br>pH 6.5 ( $\mu\text{M}$ ) | LogD<br>pH 7.4 |
|------------|-------------------|----------------------------------------|----------------------------------------|----------------|
| <b>8af</b> | -H                | $\geq 80$                              | 20-39.9                                | 2.03           |
| <b>8ag</b> | -OCH <sub>3</sub> | $\geq 80$                              | 20-39.9                                | 1.91           |
| <b>8ah</b> | -F                | $\geq 80$                              | $\geq 80$                              | 2.17           |
| <b>8ai</b> | -CF <sub>3</sub>  | $\geq 80$                              | 1-19.9                                 | 3.01           |

**Table S4:** Solubility and LogD of Piperazinyl-Substituted 4(1*H*)-Quinolones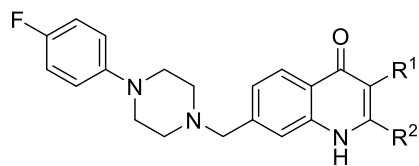

| Compound   | R   | R <sup>2</sup>   | Solubility<br>pH 2.0 (μM) | Solubility<br>pH 6.5 (μM) | LogD<br>pH 7.4 |
|------------|-----|------------------|---------------------------|---------------------------|----------------|
| <b>8ak</b> | -Br | -H               | ≥ 80                      | 20-39.9                   | 2.91           |
| <b>8al</b> | -Cl | -H               | ≥ 80                      | 40-59.9                   | 2.57           |
| <b>8am</b> | -H  | -CH <sub>3</sub> | ≥ 80                      | ≥ 80                      | 2.44           |
| <b>8an</b> | -Br | -CH <sub>3</sub> | ≥ 80                      | 1-19.9                    | 2.83           |
| <b>8ao</b> | -Cl | -CH <sub>3</sub> | ≥ 80                      | 1-19.9                    | 2.73           |
